# Supplementary material for: A complex-polarization-propagator protocol for magneto-chiral axial dichroism and birefringence dispersion
Source: Royal Society of Chemistry journal article supplement (doi:10.1039/c6cp01465h), 2016-01-01
Supplement: c6cp01465h1.pdf [file c6cp01465h1.pdf]

## Electronic Supplementary Information:

### A complex-polarization-propagator protocol for magneto-chiral axial dichroism and birefringence dispersion

Janusz Cukras,<sup>1,2</sup> Joanna Kauczor, Patrick Norman,<sup>3</sup> Antonio Rizzo,<sup>4</sup> Geert L.J.A. Rikken,<sup>5</sup> and Sonia Coriani<sup>1,6, a)</sup>

<sup>1)</sup>*Dipartimento di Scienze Chimiche e Farmaceutiche, Università degli Studi di Trieste, I-34127 Trieste, Italy*

<sup>2)</sup>*Faculty of Chemistry, University of Warsaw, Pasteura 1, 02-093 Warszawa, Poland*

<sup>3)</sup>*Department of Physics, Chemistry and Biology, Linköping University, S-58183, Linköping*

<sup>4)</sup>*Consiglio Nazionale delle Ricerche-CNR, Istituto per i Processi Chimico-Fisici, Sede Secondaria di Pisa, Area della Ricerca, Via G. Moruzzi 1, I-56124 Pisa, Italy*

<sup>5)</sup>*Laboratoire National des Champs Magnétiques Intenses, UPR3228 CNRS/INSA/UJF/UPS, Toulouse & Grenoble, France.*

<sup>6)</sup>*Aarhus Institute of Advanced Studies, University of Aarhus, DK-8000 Århus C, Denmark*

(Dated: 9 April 2016)

We collect here the results of the basis set study of the electronic circular dichroism, magnetic circular dichroism, magneto-chiral dichroism, optical rotatory dispersion, magnetic optical rotation dispersion and magneto-chiral birefringence dispersion in the resonant frequency regions of R-methyloxirane and L-alanine at the Hartree-Fock, B3LYP and CAMB3LYP levels of theory. Tables collecting excitation energies, oscillator strengths and rotatory strengths for the first ten excitations for all three systems and methods, plus a plot illustrating the dependence on the choice of gauge-origin of the magneto-chiral dichroism of R-methyloxirane, are also included.

---

<sup>a)</sup>Corresponding author: coriani@units.it

## I. R-METHYLOXIRANE

TABLE I. Excitation energies, oscillator strengths ( $f$ ) and rotatory strengths ( $R$ ) for the first 10 excitations of R-methyloxirane. Hartree–Fock and TD-DFT results in the t-aug-cc-pVDZ basis set.

| No. | Hartree–Fock    |                |        |         | CAMB3LYP        |                |        |         | B3LYP           |                |        |         |
|-----|-----------------|----------------|--------|---------|-----------------|----------------|--------|---------|-----------------|----------------|--------|---------|
|     | $\omega_i$ , eV | $\lambda$ , nm | $f$    | $R$     | $\omega_i$ , eV | $\lambda$ , nm | $f$    | $R$     | $\omega_i$ , eV | $\lambda$ , nm | $f$    | $R$     |
| 1   | 8.831           | 140.4          | 0.0026 | −1.009  | 7.101           | 174.6          | 0.0075 | −14.047 | 6.442           | 192.5          | 0.0092 | −16.326 |
| 2   | 8.980           | 138.1          | 0.0068 | 4.706   | 7.365           | 168.3          | 0.0169 | −8.042  | 6.836           | 181.4          | 0.0068 | 7.493   |
| 3   | 9.214           | 134.6          | 0.0457 | −19.796 | 7.515           | 165.0          | 0.0134 | 8.717   | 6.866           | 180.6          | 0.0221 | −2.007  |
| 4   | 9.265           | 133.8          | 0.0326 | −10.746 | 7.671           | 161.6          | 0.0160 | 6.089   | 6.899           | 179.7          | 0.0040 | 5.471   |
| 5   | 9.366           | 132.4          | 0.0198 | −4.041  | 7.851           | 157.9          | 0.0053 | 9.508   | 7.214           | 171.9          | 0.0005 | −1.080  |
| 6   | 9.514           | 130.3          | 0.0130 | −12.327 | 8.244           | 150.4          | 0.0090 | −9.597  | 7.273           | 170.5          | 0.0007 | 0.616   |
| 7   | 9.648           | 128.5          | 0.0075 | 10.261  | 8.279           | 149.8          | 0.0147 | 9.733   | 7.280           | 170.3          | 0.0012 | −0.250  |
| 8   | 9.870           | 125.6          | 0.0347 | 6.773   | 8.309           | 149.2          | 0.0260 | −10.258 | 7.284           | 170.2          | 0.0009 | 0.911   |
| 9   | 9.997           | 124.0          | 0.0030 | −2.728  | 8.349           | 148.5          | 0.0042 | 0.74    | 7.302           | 169.8          | 0.0056 | 6.634   |
| 10  | 10.160          | 122.0          | 0.0305 | 7.693   | 8.373           | 148.1          | 0.0103 | −5.869  | 7.313           | 169.5          | 0.0001 | 0.243   |

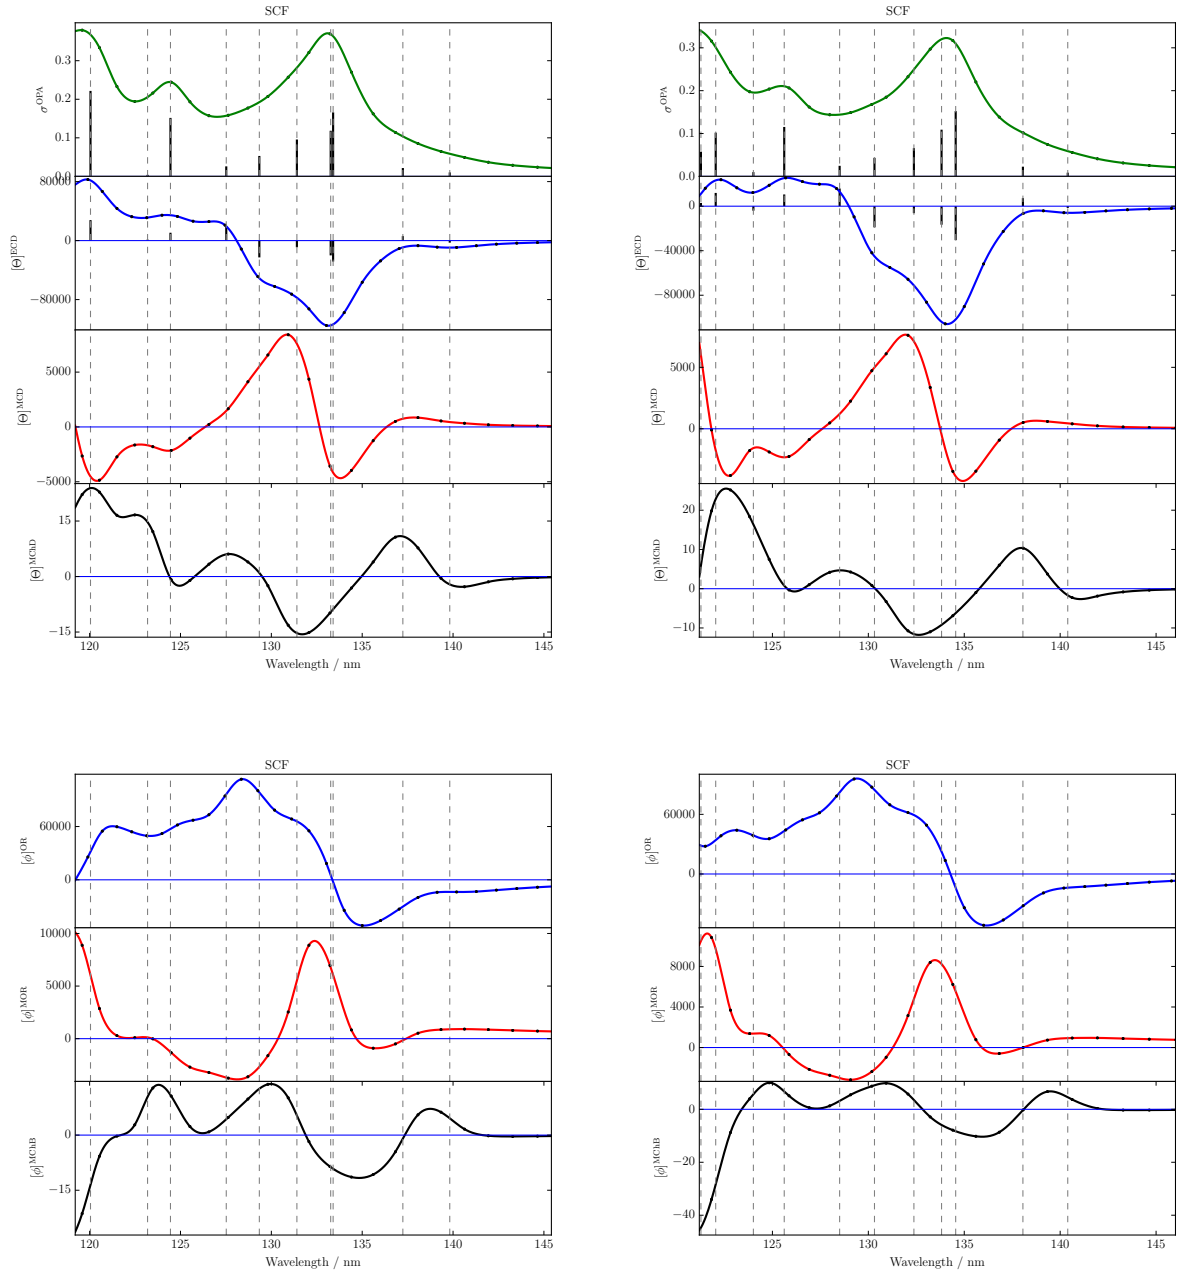

FIG. 1. R-Methyloxirane. Upper panels: One Photon Absorption (OPA) cross sections, Electronic Circular Dichroism (ECD), Magnetic Circular Dichroism (MCD) and Magneto-chiral Dichroism (MChD) calculated at the Hartree-Fock level for basis set aug-cc-pVDZ (left) and d-aug-cc-pVDZ (right). Lower panels: Natural Optical Rotatory (OR), Magnetic Optical Rotation (MOR) and Magneto-chiral Birefringence (MChB) dispersions calculated at the calculated acalculated at the Hartree-Fock level for basis set aug-cc-pVDZ (left) and d-aug-cc-pVDZ (right). Absorption cross sections are given in atomic units.

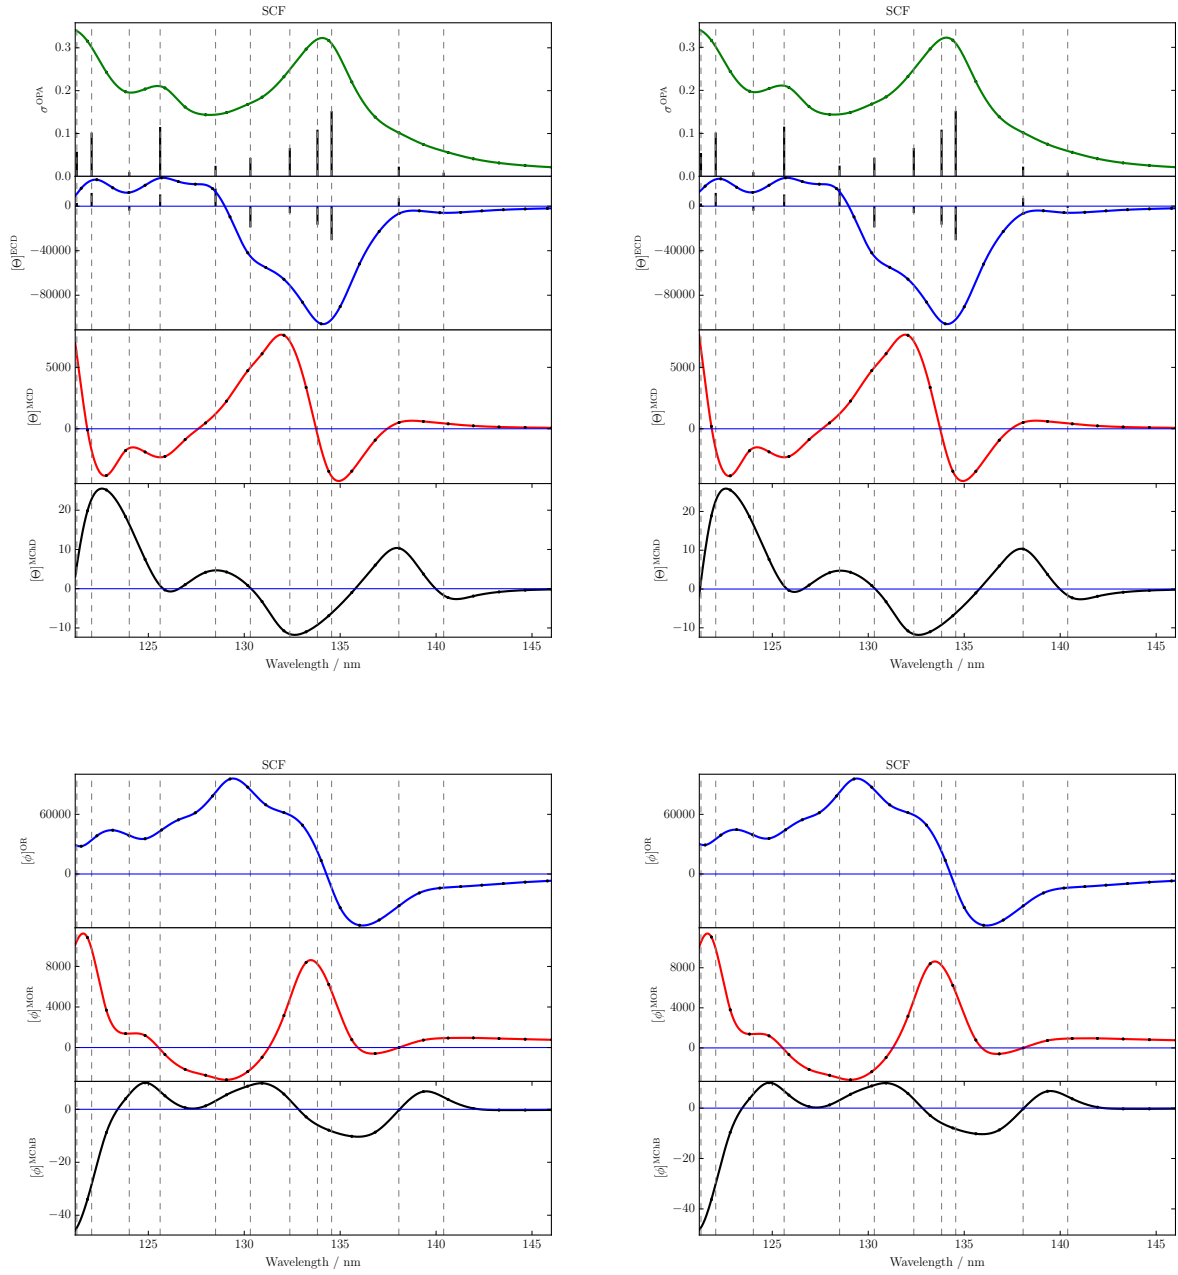

FIG. 2. R-Methyloxirane. Upper panels: One Photon Absorption (OPA) cross sections, Electronic Circular Dichroism (ECD), Magnetic Circular Dichroism (MCD) and Magneto-chiral Dichroism (MChD) calculated at the Hartree-Fock level for basis set d-aug-cc-pVDZ (left) and t-aug-cc-pVDZ (right). Lower panels: Natural Optical Rotatory (OR), Magnetic Optical Rotation (MOR) and Magneto-chiral Birefringence (MChB) dispersions calculated at the calculated at the Hartree-Fock level for basis set d-aug-cc-pVDZ (left) and t-aug-cc-pVDZ (right).

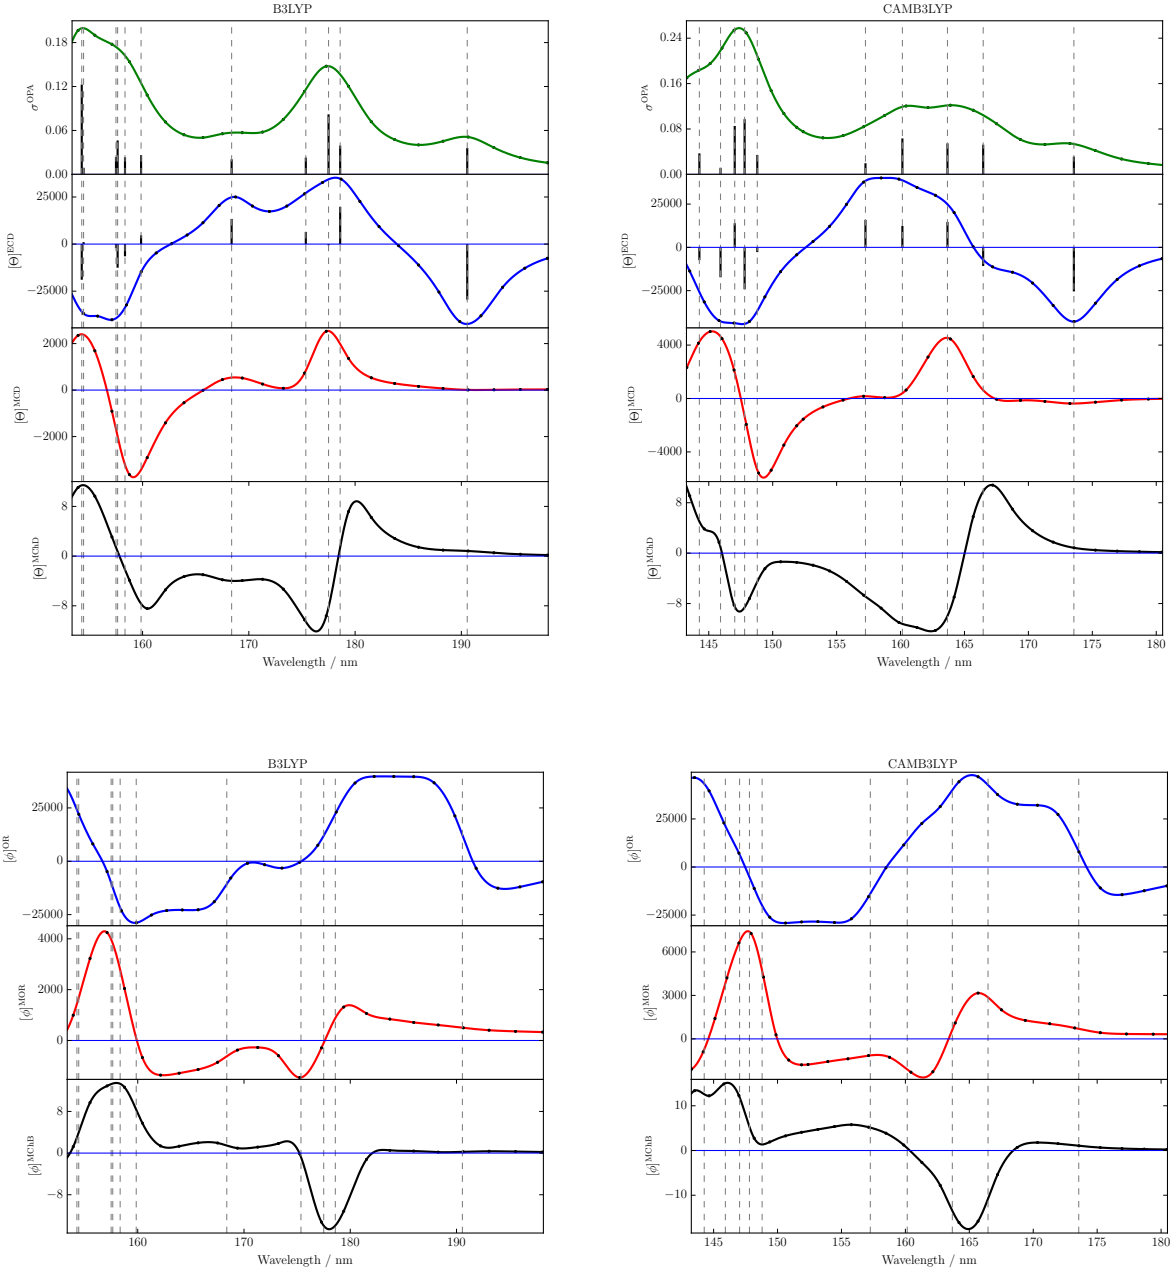

FIG. 3. R-Methyloxirane. Upper panels: One Photon Absorption (OPA) cross sections, Electronic Circular Dichroism (ECD), Magnetic Circular Dichroism (MCD) and Magneto-chiral Dichroism (MChD) calculated at the B3LYP/aug-cc-pVDZ (left) and CAMB3LYP/aug-cc-pVDZ (right) levels. Lower panels: Natural Optical Rotatory (OR), Magnetic Optical Rotation (MOR) and Magneto-chiral Birefringence (MChB) dispersions calculated at the B3LYP/aug-cc-pVDZ (left) and CAMB3LYP/aug-cc-pVDZ (right) levels.

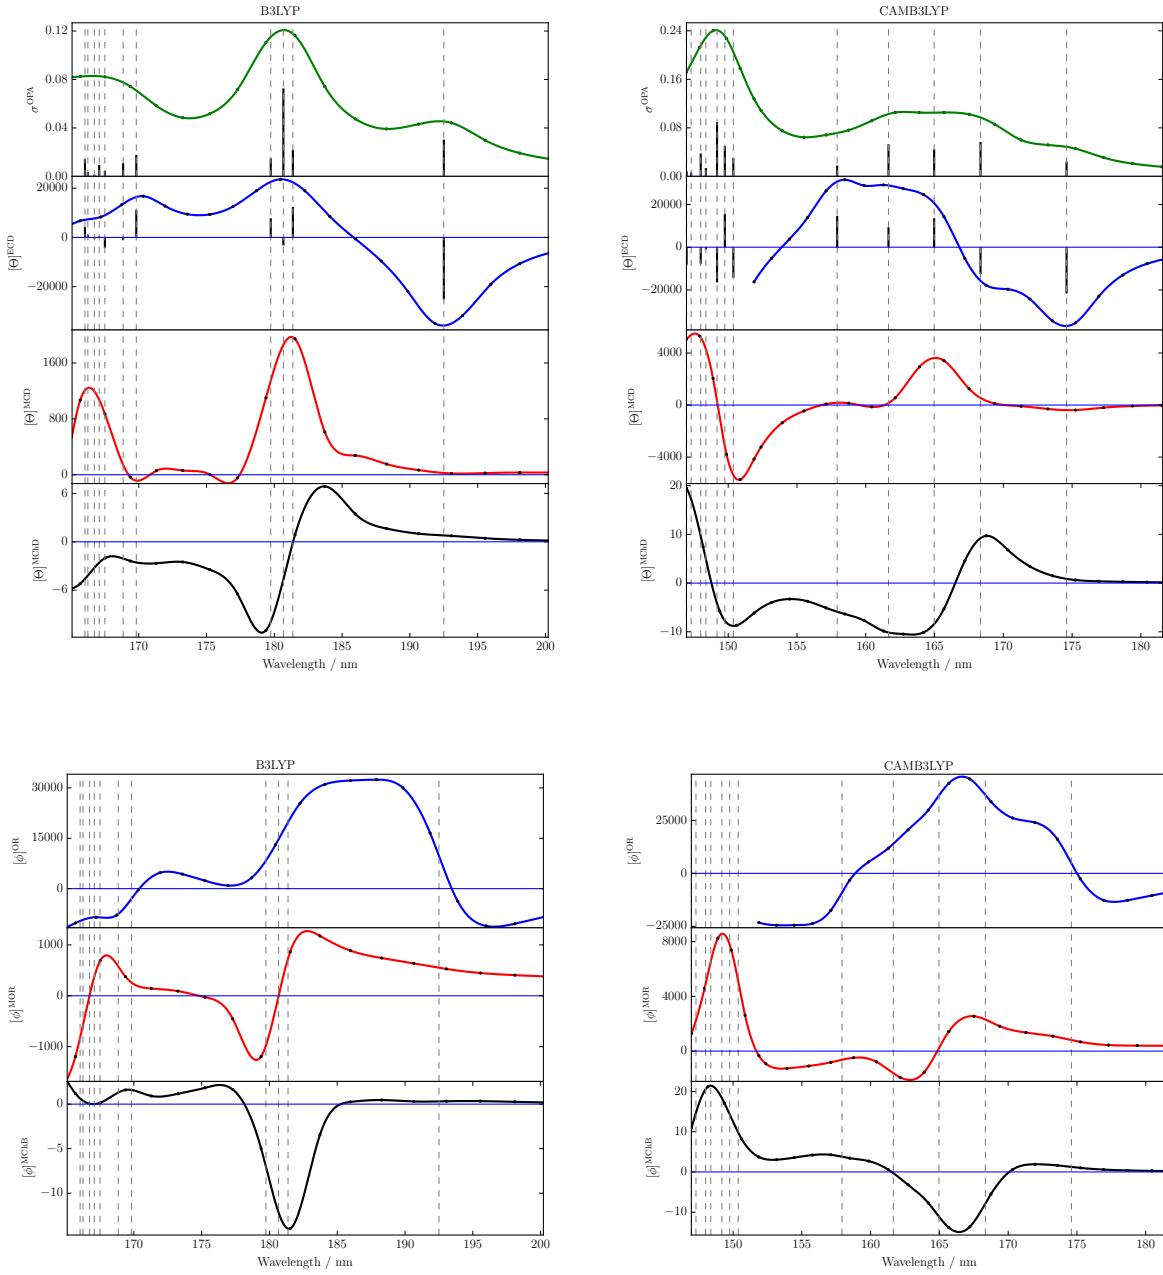

FIG. 4. R-Methyloxirane. Upper panels: One Photon Absorption (OPA) cross sections, Electronic Circular Dichroism (ECD), Magnetic Circular Dichroism (MCD) and Magneto-chiral Dichroism (MChD) calculated at the B3LYP/d-aug-cc-pVDZ (left) and CAMB3LYP/d-aug-cc-pVDZ (right) levels. Lower panels: Natural Optical Rotatory (OR), Magnetic Optical Rotation (MOR) and Magneto-chiral Birefringence (MChB) dispersions calculated at the B3LYP/d-aug-cc-pVDZ (left) and CAMB3LYP/d-aug-cc-pVDZ (right) levels.

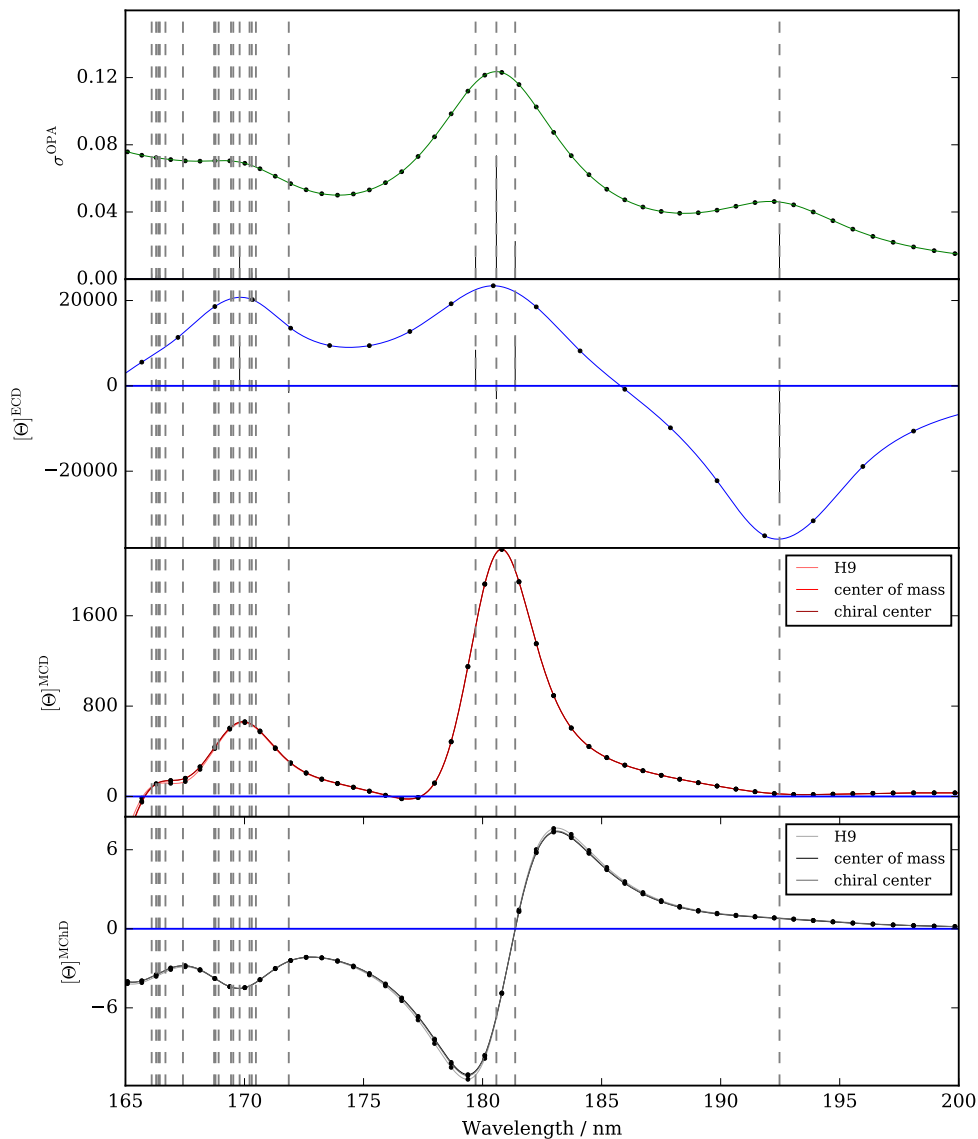

FIG. 5. R-Methyloxirane. One Photon Absorption (OPA) cross sections, Electronic Circular Dichroism (ECD), Magnetic Circular Dichroism (MCD) and Magneto-chiral Dichroism (MChD) calculated at the B3LYP/t-aug-cc-pVDZ level. Dependence of the MCD and MChD spectra on the choice of gauge-origin. H9 is the hydrogen atom positioned furthest away from the center of mass.

## II. L-ALANINE

TABLE II. L-Alanine, conformer I. Excitation energies, oscillator strengths ( $f$ ) and rotatory strengths ( $R$ ) for the first 10 excitations. Hartree-Fock and TD-DFT results in the t-aug-cc-pVDZ basis set. Ionisation potentials according to Koopmans' theorem: B3LYP = 7.12 eV; CAMB3LYP=8.92 eV; SCF=11.24 eV

| No. | Hartree-Fock    |                |        |        | CAMB3LYP        |                |        |        | B3LYP           |                |        |        |
|-----|-----------------|----------------|--------|--------|-----------------|----------------|--------|--------|-----------------|----------------|--------|--------|
|     | $\omega_i$ , eV | $\lambda$ , nm | $f$    | $R$    | $\omega_i$ , eV | $\lambda$ , nm | $f$    | $R$    | $\omega_i$ , eV | $\lambda$ , nm | $f$    | $R$    |
| 1   | 6.625           | 187.1          | 0.0016 | 8.218  | 5.806           | 213.5          | 0.0012 | 7.65   | 5.591           | 221.8          | 0.0024 | 7.249  |
| 2   | 7.760           | 159.8          | 0.0214 | -2.045 | 6.363           | 194.9          | 0.0123 | -1.519 | 5.870           | 211.2          | 0.0046 | -7.145 |
| 3   | 8.654           | 143.3          | 0.0105 | 1.091  | 6.664           | 186.1          | 0.0025 | 1.518  | 5.972           | 207.6          | 0.0012 | 7.463  |
| 4   | 8.875           | 139.7          | 0.0336 | 12.43  | 7.070           | 175.4          | 0.0763 | -13.15 | 6.323           | 196.1          | 0.0605 | -3.580 |
| 5   | 8.918           | 139.0          | 0.0622 | -38.31 | 7.171           | 172.9          | 0.0076 | -2.206 | 6.527           | 190.0          | 0.0018 | -0.928 |
| 6   | 9.324           | 133.0          | 0.0273 | 2.183  | 7.394           | 167.7          | 0.0062 | -0.637 | 6.644           | 186.6          | 0.0106 | 3.214  |
| 7   | 9.404           | 131.8          | 0.0353 | 9.016  | 7.524           | 164.8          | 0.0077 | 1.751  | 6.694           | 185.2          | 0.0162 | -9.533 |
| 8   | 9.525           | 130.2          | 0.0766 | -4.452 | 7.856           | 157.8          | 0.0073 | -0.374 | 6.900           | 179.7          | 0.0003 | -0.481 |
| 9   | 9.546           | 129.9          | 0.0004 | -0.775 | 7.951           | 155.9          | 0.0053 | 5.397  | 6.956           | 178.2          | 0.0006 | 0.109  |
| 10  | 9.641           | 128.6          | 0.0053 | -1.803 | 7.979           | 155.4          | 0.0016 | 0.294  | 6.976           | 177.7          | 0.0001 | -0.045 |



TABLE III. L-Alanine, conformer IIA. Excitation energies, oscillator strengths ( $f$ ) and rotatory strengths  $R$  for the first 10 excitations. Hartree-Fock and TD-DFT results in the t-aug-cc-pVDZ basis set. Ionisation potentials according to Koopmanns theorem: B3LYP = 7.27 eV; CAMB3LYP= 9.08 eV; SCF=11.54 eV

| No. | Hartree-Fock    |                |        |        | CAMB3LYP        |                |        |        | B3LYP           |                |        |        |
|-----|-----------------|----------------|--------|--------|-----------------|----------------|--------|--------|-----------------|----------------|--------|--------|
|     | $\omega_i$ , eV | $\lambda$ , nm | $f$    | $R$    | $\omega_i$ , eV | $\lambda$ , nm | $f$    | $R$    | $\omega_i$ , eV | $\lambda$ , nm | $f$    | $R$    |
| 1   | 6.4805          | 191.3          | 0.0015 | 1.759  | 5.664           | 218.9          | 0.0010 | 3.967  | 5.536           | 224.0          | 0.0014 | 11.68  |
| 2   | 7.8523          | 157.9          | 0.0166 | 1.634  | 6.420           | 193.1          | 0.0098 | -4.790 | 5.759           | 215.3          | 0.0106 | -12.91 |
| 3   | 8.8477          | 140.1          | 0.0412 | -9.635 | 7.124           | 174.0          | 0.0402 | 4.835  | 6.559           | 189.0          | 0.0008 | -2.827 |
| 4   | 9.0465          | 137.0          | 0.0055 | 12.44  | 7.374           | 168.1          | 0.0015 | -1.924 | 6.602           | 187.8          | 0.0296 | 2.747  |
| 5   | 9.1889          | 134.9          | 0.0614 | -16.92 | 7.505           | 165.2          | 0.0100 | -11.31 | 6.704           | 184.9          | 0.0014 | -2.127 |
| 6   | 9.2661          | 133.8          | 0.1258 | 8.618  | 7.593           | 163.3          | 0.0126 | -9.311 | 6.772           | 183.1          | 0.0128 | -9.692 |
| 7   | 9.5483          | 129.8          | 0.0096 | 2.867  | 7.817           | 158.6          | 0.0093 | -5.362 | 7.010           | 176.9          | 0.0009 | -0.422 |
| 8   | 9.6668          | 128.2          | 0.0202 | -16.92 | 7.973           | 155.5          | 0.0040 | -2.759 | 7.069           | 175.4          | 0.0074 | -6.236 |
| 9   | 9.6709          | 128.2          | 0.0004 | 2.49   | 8.053           | 154.0          | 0.0003 | -0.604 | 7.110           | 174.4          | 0.0003 | -0.432 |
| 10  | 9.8265          | 126.2          | 0.0085 | 5.183  | 8.106           | 153.0          | 0.0006 | 0.964  | 7.124           | 174.0          | 0.0001 | -0.069 |

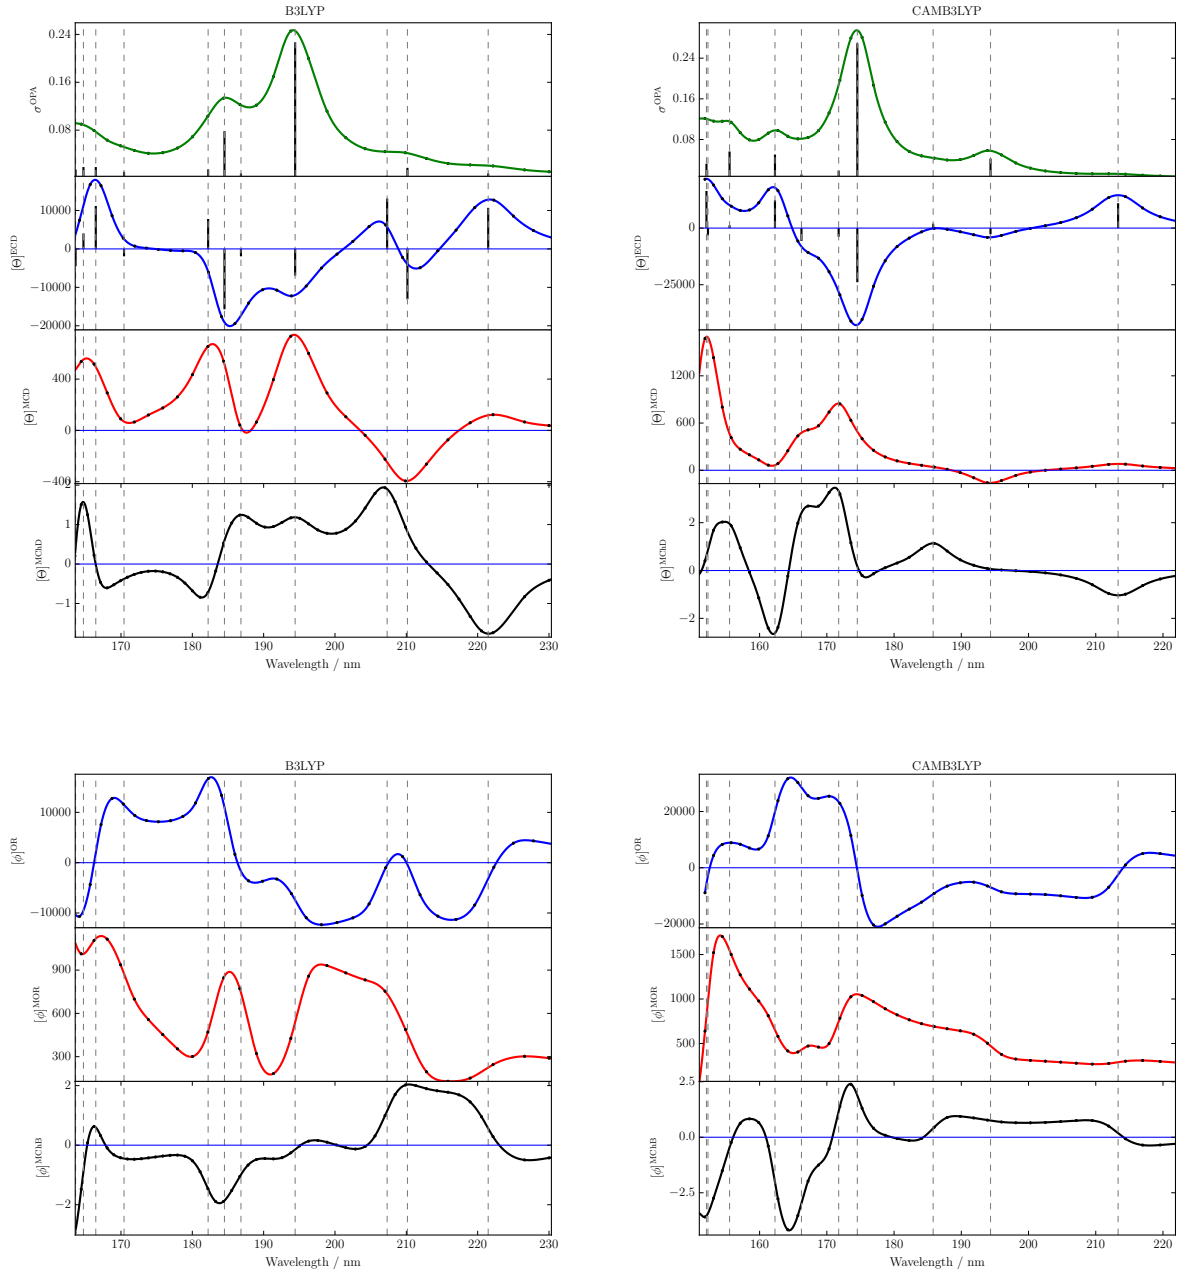

FIG. 6. L-Alanine, conformer I. Upper panels: One Photon Absorption (OPA) cross sections, Electronic Circular Dichroism (ECD), Magnetic Circular Dichroism (MCD) and Magneto-chiral Dichroism (MChD), calculated at the B3LYP/aug-cc-pVDZ (left) and CAMB3LYP/aug-cc-pVDZ (right) levels. Lower panels: Natural Optical Rotatory (OR), Magnetic Optical Rotation (MOR) and Magneto-chiral Birefringence (MChB) dispersions, calculated at B3LYP/aug-cc-pVDZ (left) and CAMB3LYP/aug-cc-pVDZ (right) levels.

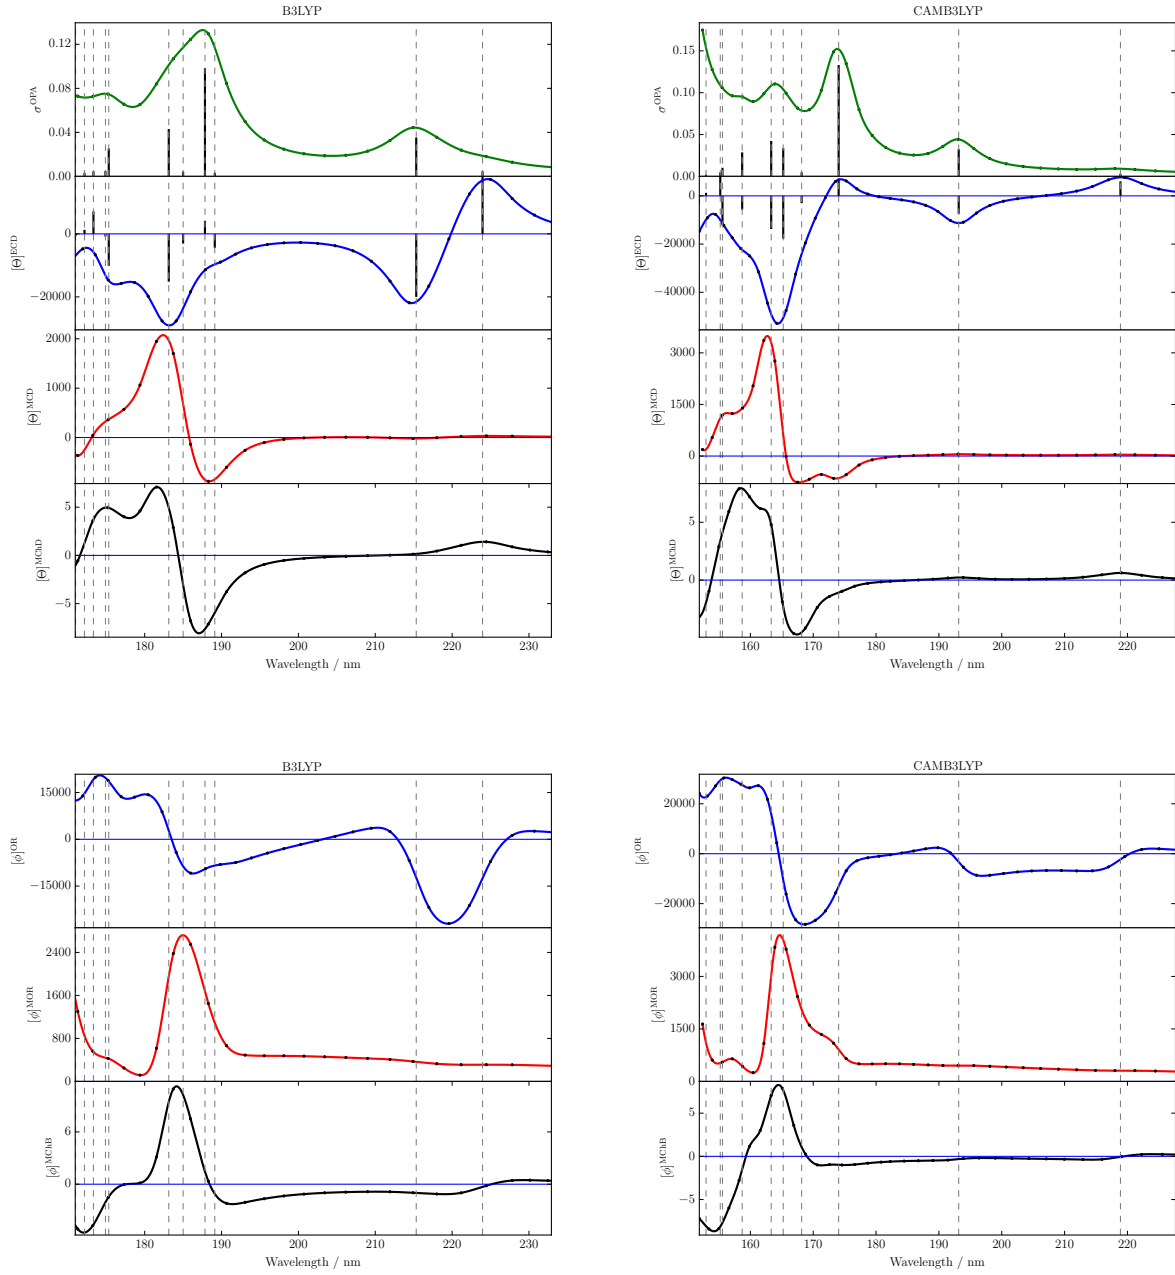

FIG. 7. L-Alanine, conformer IIA. Upper panels: One Photon Absorption (OPA) cross section, Electronic Circular Dichroism (ECD), Magnetic Circular Dichroism (MCD) and Magneto-chiral Dichroism (MChD), calculated at B3LYP/d-aug-cc-pVDZ (left) and CAMB3LYP/d-aug-cc-pVDZ (right) levels of theory. Lower panels: Natural Optical Rotatory (OR), Magnetic Optical Rotation (MOR) and Magneto-chiral Birefringence (MChB) dispersions, calculated at B3LYP/d-aug-cc-pVDZ (left) and CAMB3LYP/d-aug-cc-pVDZ (right) levels of theory.
